# Supplementary material
Source: PubMed Central journal article supplement (PMC11163514)
Supplement: NIHMS1990761-supplement-Suppl_Materials.pdf [file NIHMS1990761-supplement-Suppl_Materials.pdf]

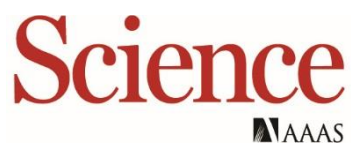

## Supplementary Materials for

### **Noninvasive assessment of gut function using transcriptional recording sentinel cells**

Florian Schmidt *et al.*

Corresponding authors: Andrew J. Macpherson, [andrew.macpherson@dbmr.unibe.ch](mailto:andrew.macpherson@dbmr.unibe.ch); Randall J. Platt, [rplatt@ethz.ch](mailto:rplatt@ethz.ch)

*Science* **376**, eabm6038 (2022)

DOI: [10.1126/science.abm6038](https://doi.org/10.1126/science.abm6038)

#### **The PDF file includes:**

Figs. S1 to S12  
Tables S22 to S25

#### **Other Supplementary Material for this manuscript includes the following:**

Tables S1 to S21  
MDAR Reproducibility Checklist

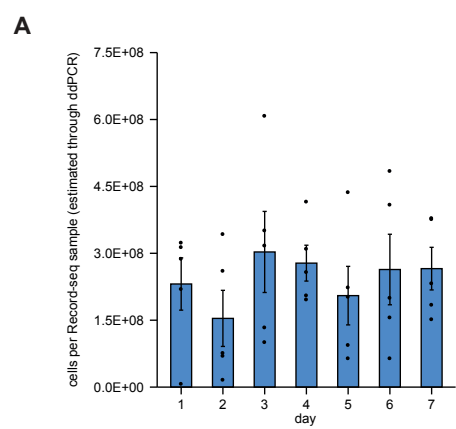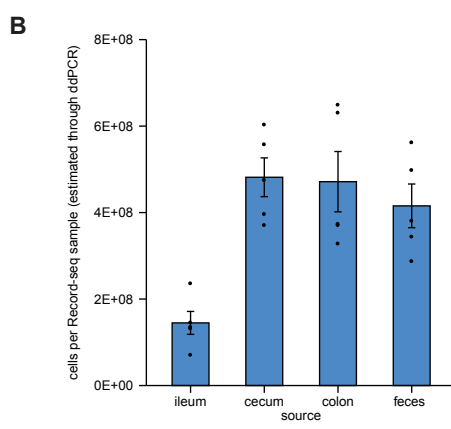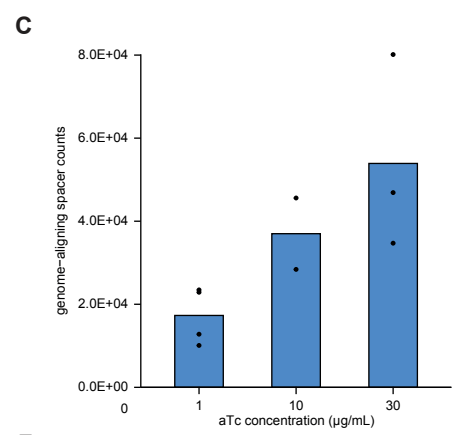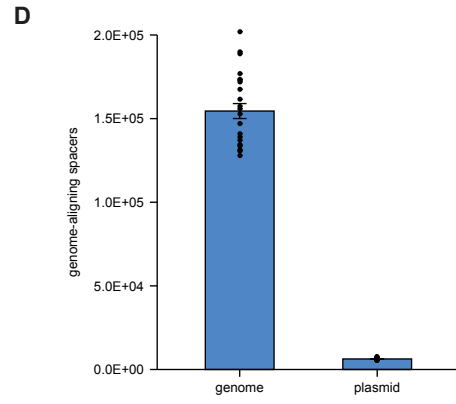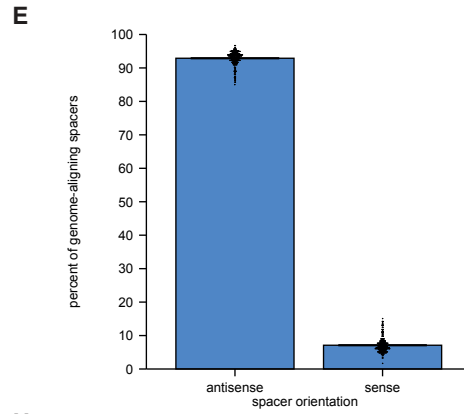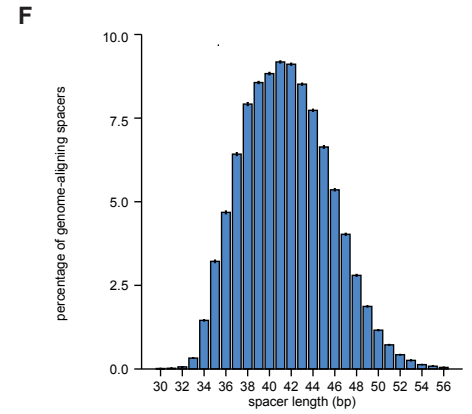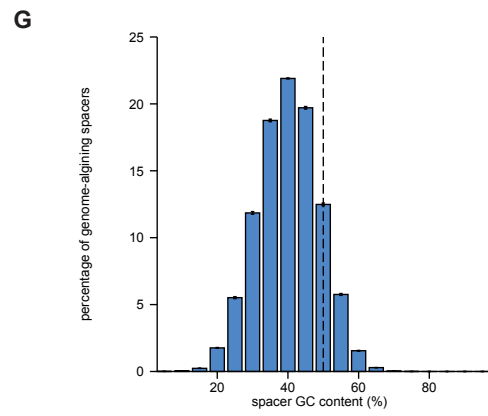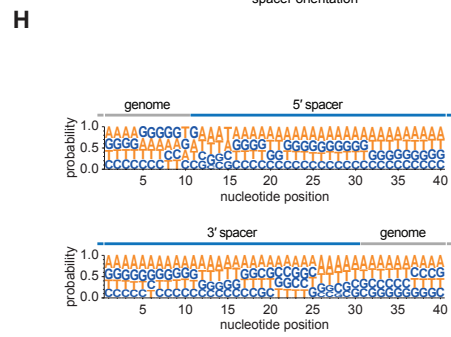

**Fig. S1. Transcriptional recording sentinel cells acquire transcriptional records within the mouse gut and preserve this information throughout time.**

(A and B) Bar plots showing the cell number used per Record-seq input as estimated by droplet digital PCR (ddPCR) from (A) feces on the indicated days after gavage of *E. coli* sentinel cells and (B) different gut sections on day 20. The concentration of the recording plasmid (pFS\_0453) was measured by ddPCR and the number of cells was calculated assuming 20 copies of pFS\_0453 (pET30b+ origin of replication) per *E. coli* cell. Shown is the mean  $\pm$  s.e.m. of n=5 independent biological replicates. (C) Bar plot showing the number of *E. coli* genome-aligning spacers obtained from colon or cecum contents of mice supplied with various concentrations of anhydrotetracycline (aTc) in the drinking water. Shown is the mean of n=2-4 independent biological replicates. (D) Bar plot showing the number of *E. coli* genome-aligning spacers and recording plasmid-derived spacers. Shown is the mean  $\pm$  s.e.m. of n=20 independent biological replicates of chow-fed mice corresponding to a total of 3,249,165 spacers (3,123,056 genome-aligning, 126,109 plasmid-aligning). (E) Bar plot showing the percentage of spacers aligning to the sense or antisense strand of *E. coli* genes. (F and G) Histograms showing the (F) length and (G) GC content distribution of *E. coli* genome-aligning spacers. (H) Nucleotide probabilities (WebLogo) of the 5' (top) and 3' (bottom) end of the spacers, along with the corresponding sequence flanking the nucleotides in the *E. coli* genome. Spacer (blue) and flanking nucleotides (gray) are indicated. Nucleotide probabilities were computed from 10,000 genome-aligning spacers and their flanking regions. Panels A and B correspond to the chow samples on day 1 to 7 and 20, respectively, from **Fig. 1D**. Panels E, F, and G were computed using 19,479,559 spacers from n=270 samples corresponding to **Fig. 1D**.

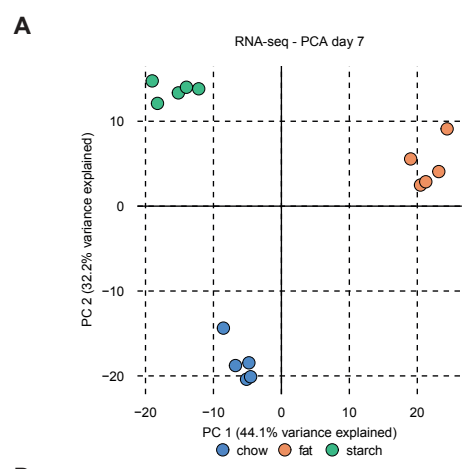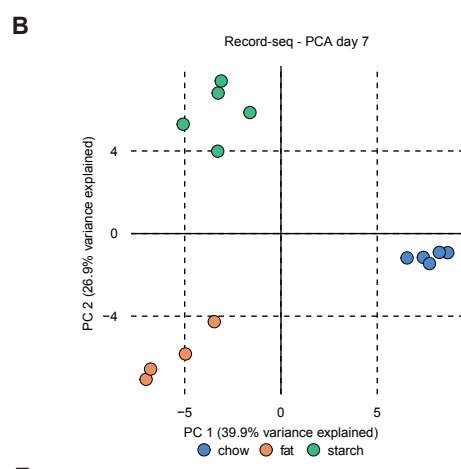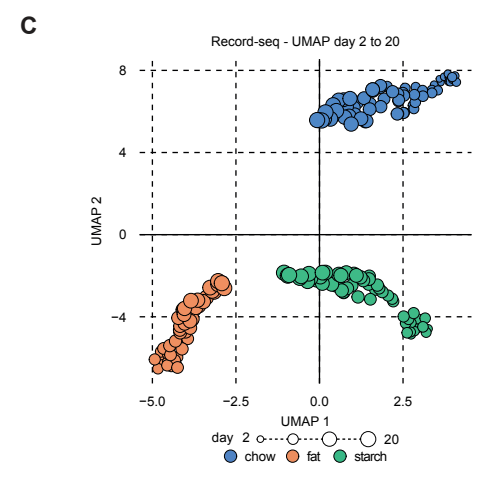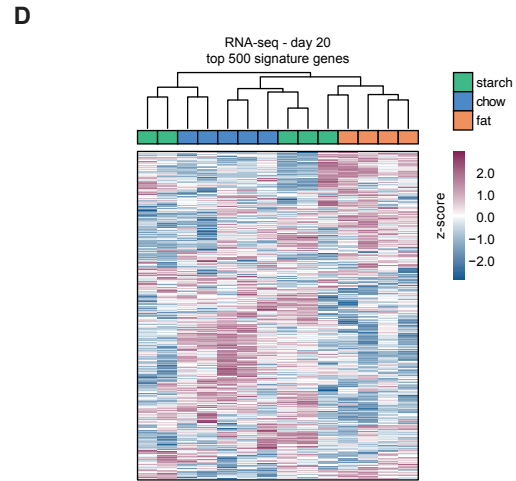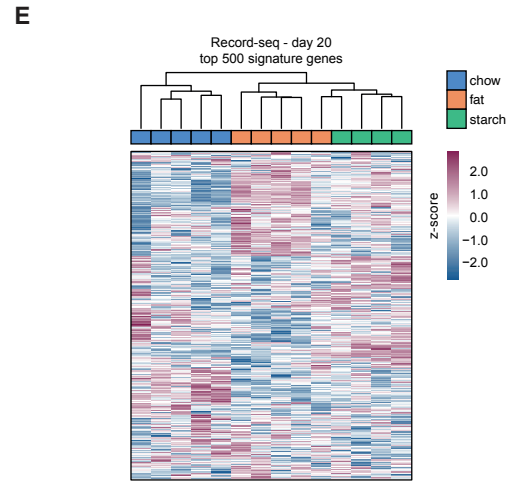

**Fig. S2. Record-seq reveals transcriptional changes describing the adaptation of *E. coli* to diet-dependent intraluminal environments.**

(A and B) PCA-projected (A) RNA-seq and (B) Record-seq data from mice fed a chow (blue), fat (orange), or starch (green) diet on day 7. (C) UMAP embedding of Record-seq data from mice fed a chow (blue), fat (orange), or starch (green) diet on days 2 to 20. Dot sizes denote successive time points. (D and E) Heatmap showing hierarchical clustering of (D) RNA-seq and (E) Record-seq data on day 20 using the top 500 diet-specific signature genes identified prior to the diet switch on day 7. Z-score standardized gene-aligning spacer counts are shown. Panels A to E correspond to **Fig. 1D** with n=5 independent biological replicates for each diet. Count thresholds were  $10^4$  (Record-seq) and  $10^5$  (RNA-seq). Outliers were excluded based on modified Z-score and relative deviation from the mean (see **Methods**).

**A**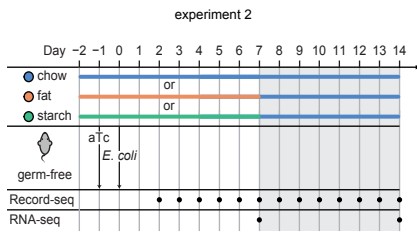**B**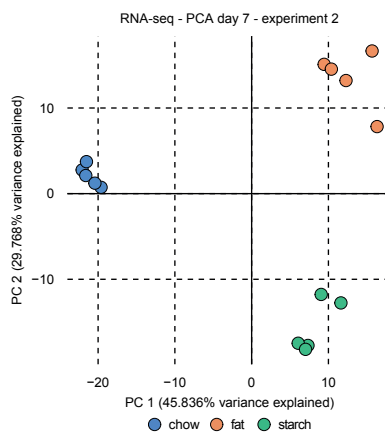**C**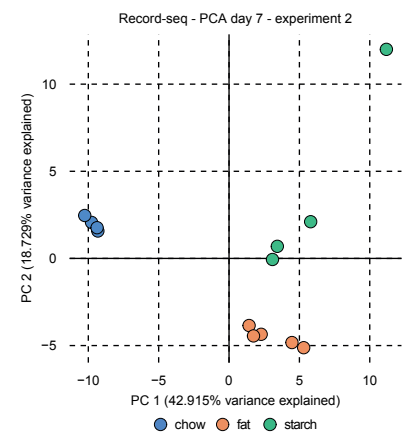**D**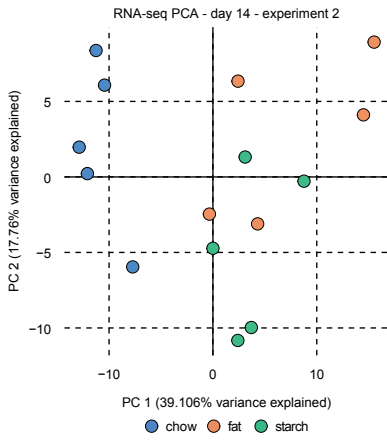**E**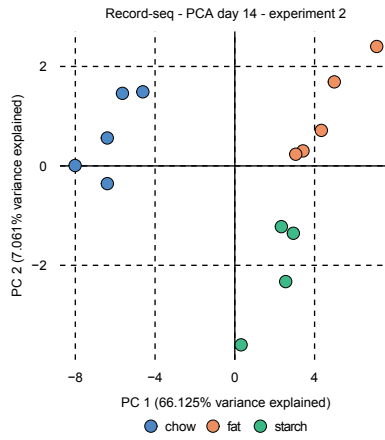**F**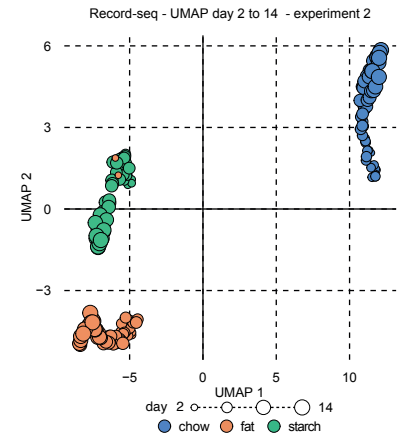**G**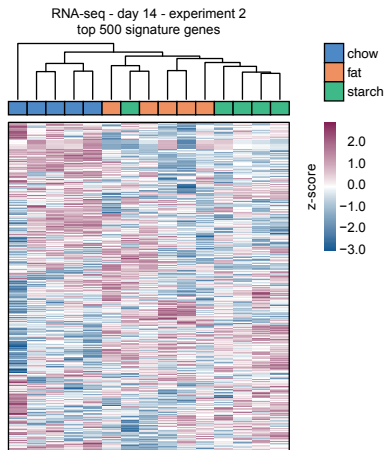**H**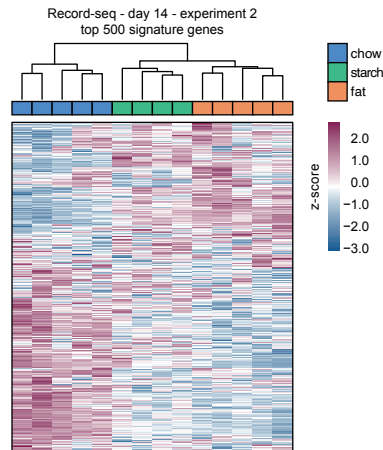**I**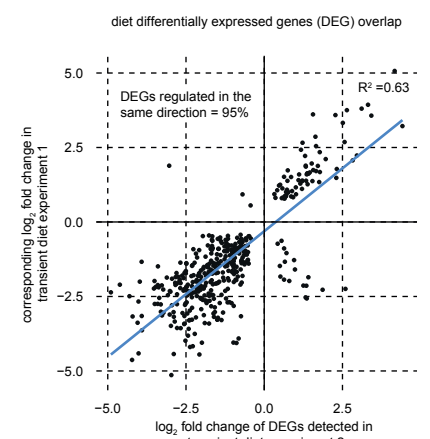

**Fig. S3. Record-seq results are reproducible across independent experiments.**

(A) Timeline of longitudinal in vivo recording experiment assessing the impact of diet on the *E. coli* transcriptome inside the gut. This was an independent replicate of the experiment in **Fig. 1D**. Germ-free mice were supplied with aTc in the drinking water and orally gavaged with *E. coli* sentinel cells. Mice were fed a chow, fat, or starch diet 2 days prior to gavage until day 7 of the experiment. From day 7 onwards, all groups received a chow diet. Fecal sampling for Record-seq and/or RNA-seq is indicated. (B and C) PCA-projected (B) RNA-seq or (C) Record-seq data on day 7. (D and E) PCA-projected (D) RNA-seq or (E) Record-seq data on day 14. (F) UMAP embedding of Record-seq data on days 2 to 14 from mice fed chow (blue), fat (orange), or starch (green) diet until day 7. Dot sizes denote successive time points. (G and H) Heatmap showing hierarchical clustering of (G) RNA-seq or (H) Record-seq data on day 14 using the top 500 diet-specific signature genes identified prior to the diet switch on day 7. Z-score standardized gene-aligning spacer counts are shown. (I) Scatter plot showing the correlation in  $\log_2FC$  of DEGs and percentage of these genes regulated in the same direction for the two diet experiments outlined in **Fig. 1D** and **fig. S3A**. Genes detected as differentially expressed in Record-seq in chow versus starch groups on day 7 in the diet experiment outlined in **Fig. 1D** were used to perform this analysis. Panels B to H correspond to **fig. S3A** with n=5 independent biological replicates for each condition. Count thresholds were  $10^4$  (Record-seq) and  $10^5$  (RNA-seq). Outliers were excluded based on modified Z-score and relative deviation from the mean (see **Methods**).

A

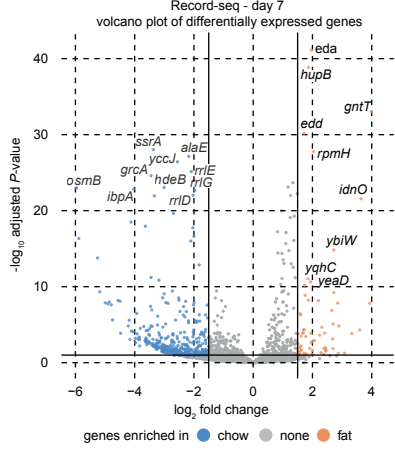

B

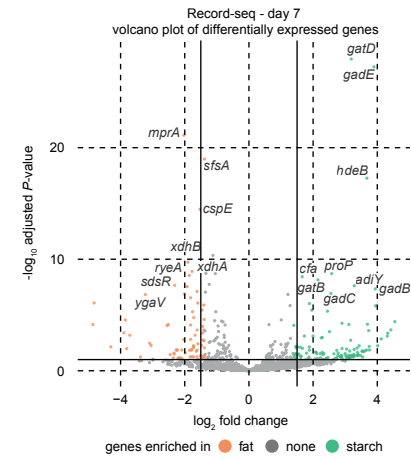

C

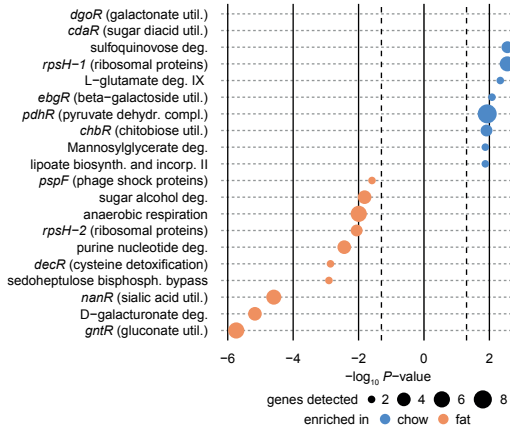

D

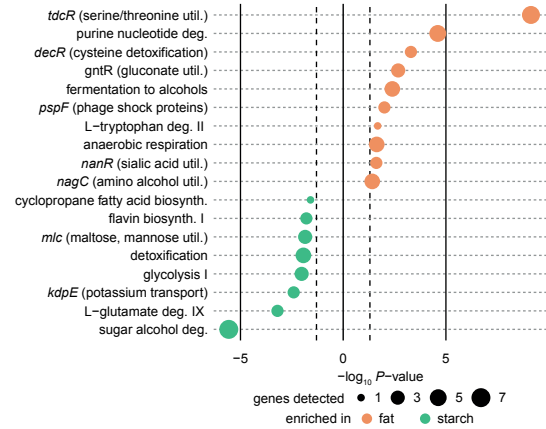

E

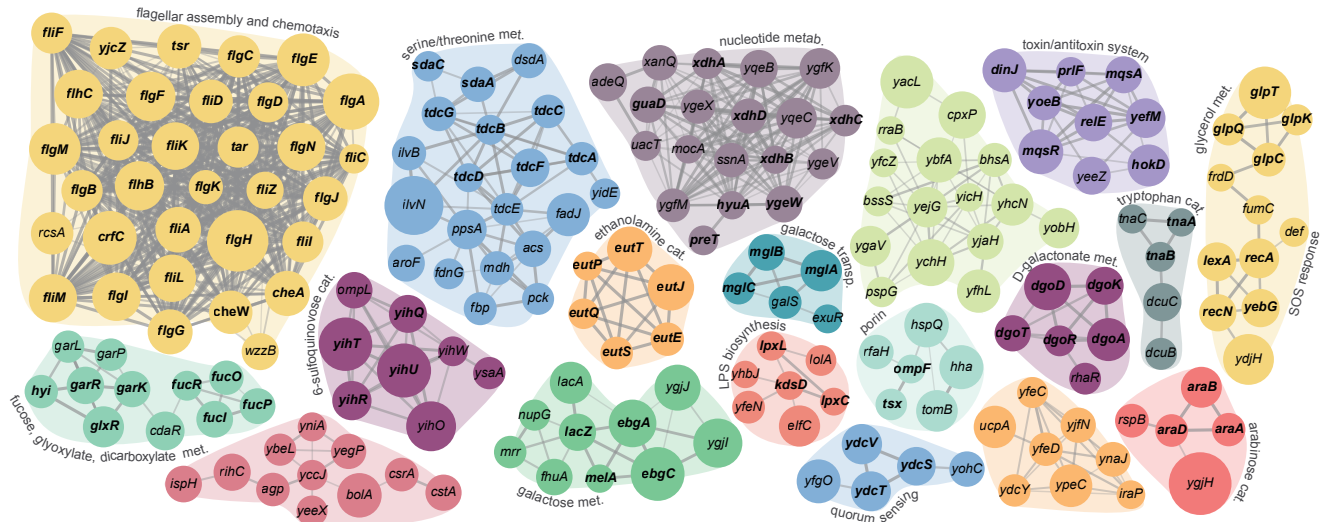

F

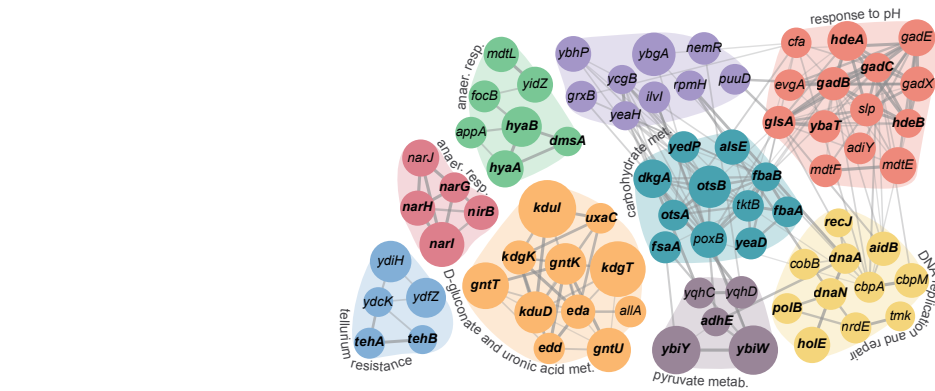



**Fig. S4. Record-seq reveals a wide-range of genes and pathways orchestrating the adaptation of *E. coli* to diet-dependent intraluminal environments.**

(A and B) Volcano plots showing Record-seq differentially expressed genes (DEGs) from mice fed a (A) chow (blue) or fat (orange) diet or a (B) fat (orange) or starch (green) diet on day 7 as shown in **Fig. 1D** scheme ( $P_{\text{adj}} < 0.1$ ;  $\log_2$ -fold change  $> 1.5$ ). (C and D) Pathways and transcriptional/translational regulators identified as enriched ( $P < 0.05$ ) using EcoCyc based on Record-seq data on day 7 from mice fed a (C) chow (blue) or fat (orange) diet or a (D) fat (orange) or starch (green) diet. Dot sizes show gene numbers detected as significantly upregulated for the respective pathway. (E and F) STRING analysis of genes significantly upregulated in *E. coli* from mice fed a (E) chow or (F) starch diet. Node size corresponds to  $\log_2 FC$  of upregulation (E: 1.0-5.0, F: 1.0-4.4). Panels A-F correspond to **Fig. 1D** with  $n=5$  independent biological replicates. Count thresholds were  $10^4$  (Record-seq) and  $10^5$  (RNA-seq). Outliers were excluded based on modified Z-score and relative deviation from the mean (see **Methods**).

**A**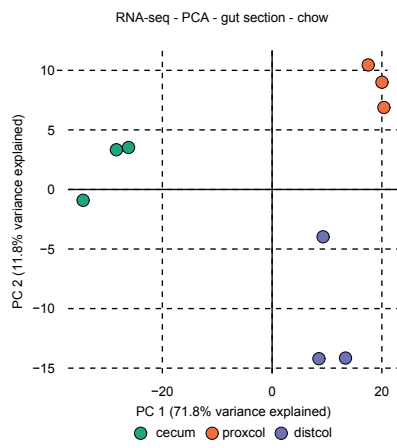**B**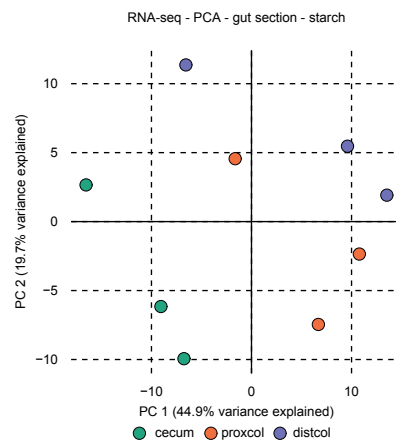**C**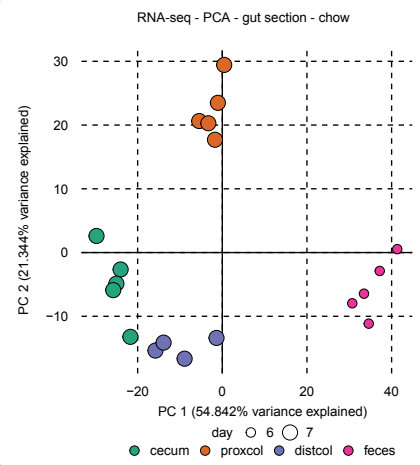**D**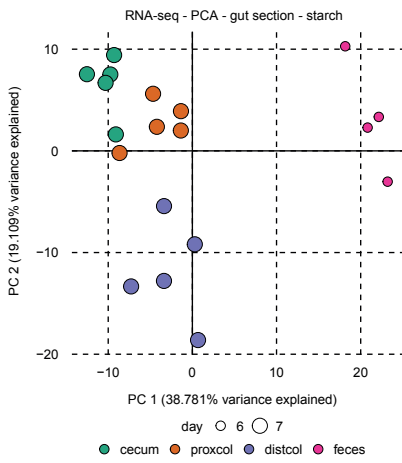**E**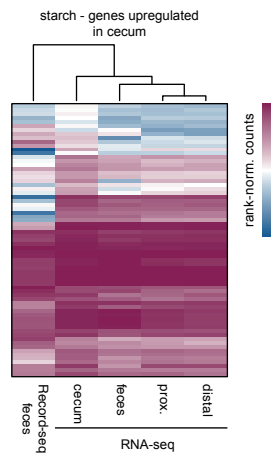**F**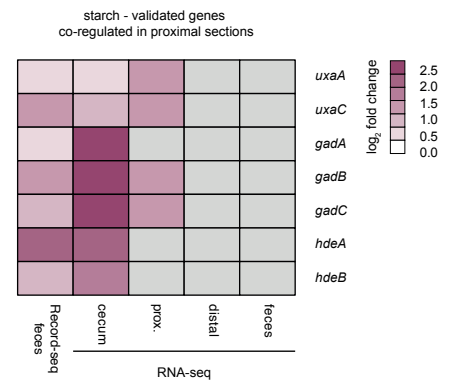**G**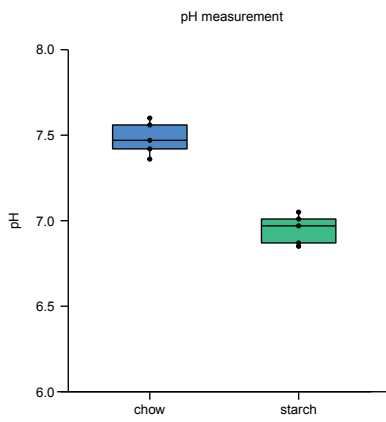

**Fig. S5. Record-seq sentinel cells capture the milieu of proximal gut sections in a non-invasive fashion.**

(A and B) PCA-projected *E. coli* RNA-seq data from cecum (green), proximal colon (orange), and distal colon (purple) of mice fed a (A) chow or (B) starch diet on day 7. (C and D) PCA-projected *E. coli* RNA-seq data from cecum (green), proximal colon (orange), distal colon (purple), and feces (pink) of mice fed a (C) chow or (D) starch diet on the indicated days. (E) Heatmap of cecum signature genes (213 genes overexpressed in the cecum) showing hierarchical clustering of rank-normalized RNA-seq and Record-seq data from the indicated intestinal sections from mice fed a starch diet. (F) Heatmap showing  $\log_2FC$  as determined by Record-seq or RNA-seq from feces, cecum, proximal colon, and distal colon for genes that were experimentally validated (*uxaAC* in **Fig. 3D**, *gadABC*, *hdeAB* in **fig. S5G**) as a subset of genes identified as differentially regulated in the chow and starch diet groups by fecal Record-seq but not fecal RNA-seq. Grey boxes indicate no significant differential regulation. (G) Box plot showing cecal luminal pH under a chow or starch diet. Representative result from two independent experiments of  $n=5$  mice per group.  $P=1.975 \cdot 10^{-5}$  (*T*-test). Panels A, B, E and F with  $n=3$  independent biological replicates each pooled from  $n=3$  individual mice. Panels C and D with  $n=5$  independent biological replicates each from an individual mouse. Count thresholds were  $10^4$  (Record-seq) and  $10^5$  (RNA-seq). Outliers were excluded based on modified Z-score and relative deviation from the mean (see **Methods**).

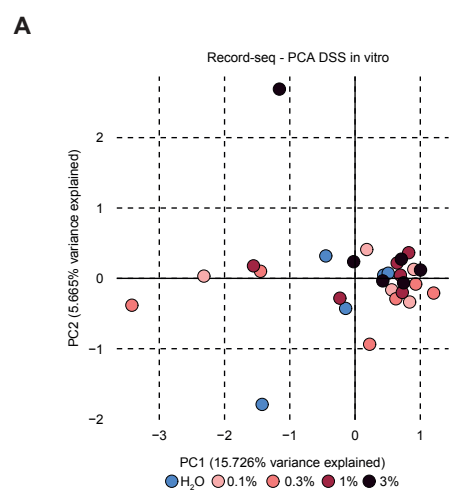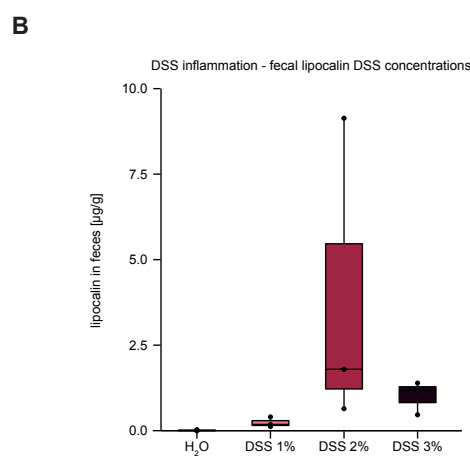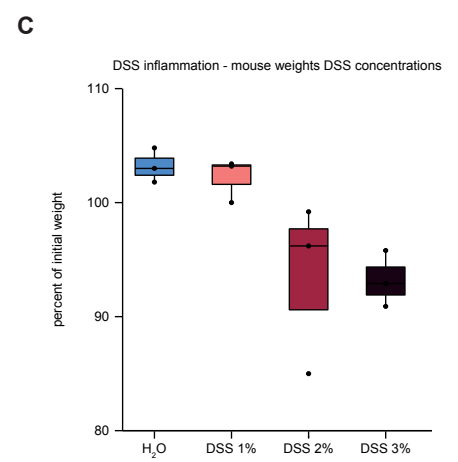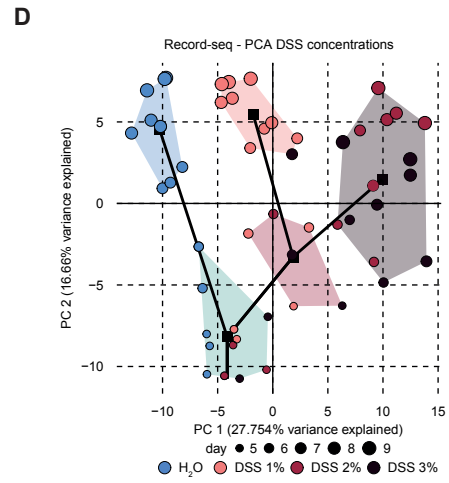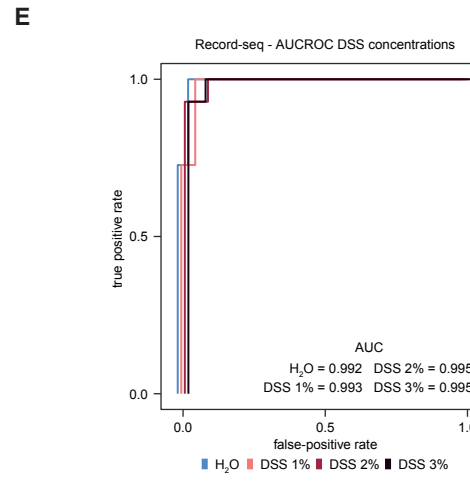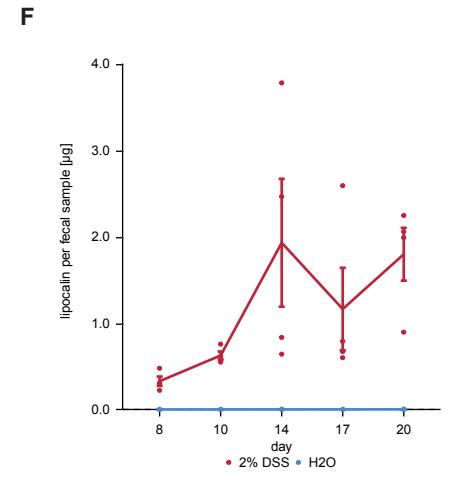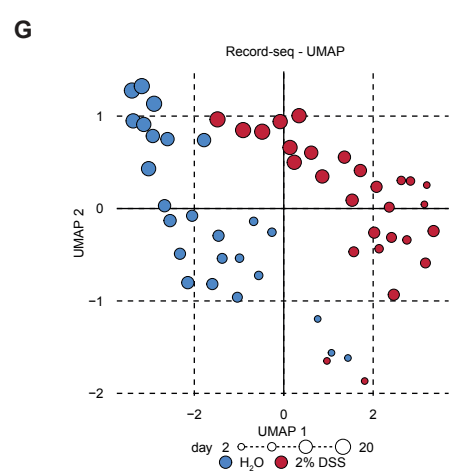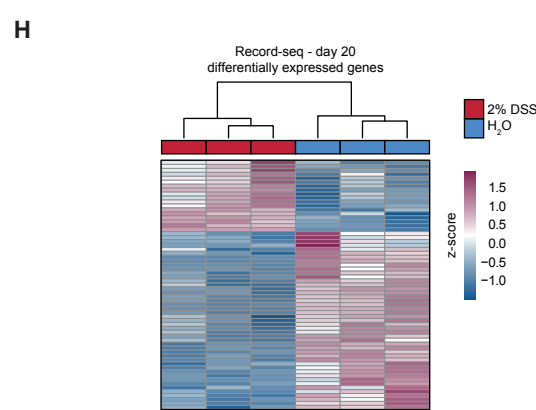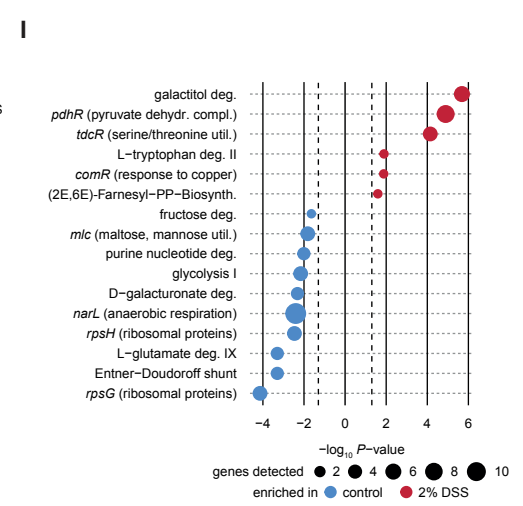

**Fig. S6. Record-seq provides a non-invasive assessment of DSS-induced colitis.**

(A) PCA-projected of Record-seq data of *E. coli* exposed in vitro to 0 (blue), 0.1% (light pink), 0.3% (salmon), 1% (red), or 3% (black) dextran sulfate sodium (DSS), n=5 independent biological replicates. (B and C) Box plots showing (B) fecal lipocalin levels and (C) percent of initial weight on day 10 in control mice (blue) or mice treated with 1% (salmon), 2% (red), or 3% (black) DSS, n=3 for each condition (D) PCA-projected trajectory plot of Record-seq data from control mice (blue) and mice treated with 1% (salmon), 2% (red), or 3% (black) DSS. Convex hulls represent k-medoids clusters (see **Methods**). Dot sizes denote successive time points. (E) Area under the receiver operating characteristic curve (AUCROC) for evaluating the performance of multi-class SVM classifiers for distinguishing Record-seq samples based on DSS treatment groups. (F) Line plot showing fecal lipocalin levels from control mice (blue) or mice treated with 2% DSS (red), shown is mean  $\pm$  s.e.m. (G) UMAP embedding of Record-seq data from control mice (blue) or mice treated with 2% DSS (red). Dot sizes denote successive time points from day 2 to 20. (H) Heatmap showing hierarchical clustering of Record-seq data from control mice (blue) or mice treated with 2% DSS (red), using differentially expressed genes identified on day 20. Z-score standardized gene-aligning spacer counts are shown. (I) Pathways and transcriptional/translational regulators identified as enriched ( $P < 0.05$ ) using EcoCyc based on Record-seq data on days 2-20 for control mice (blue) or mice treated with 2% DSS (red). Dot size increases with number of significantly upregulated genes for the respective pathway. Panels B to E correspond to **Fig. 4A** with n=3 independent biological replicates. Panels F to I correspond to **Fig. 4D** with n=3-4 independent biological replicates. Count thresholds were  $10^4$  (panels A and G to I).  $5 \cdot 10^3$  (panels D and E). Outliers were excluded based on modified Z-score and relative deviation from the mean (see **Methods**).

**A**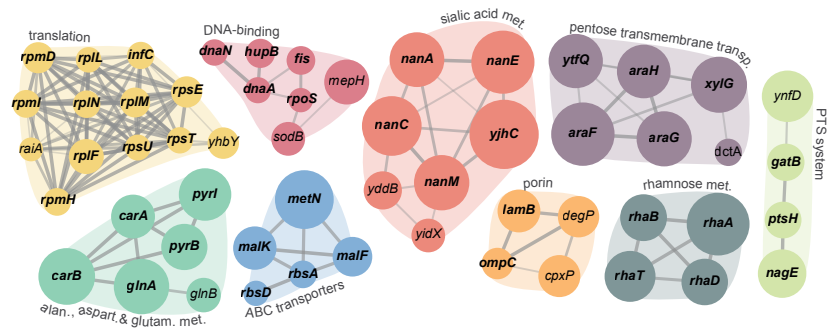**B**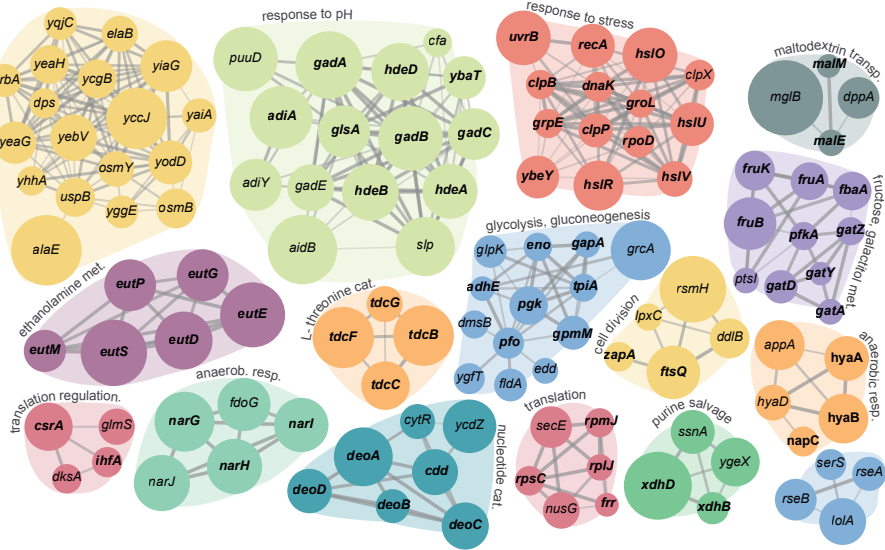**C**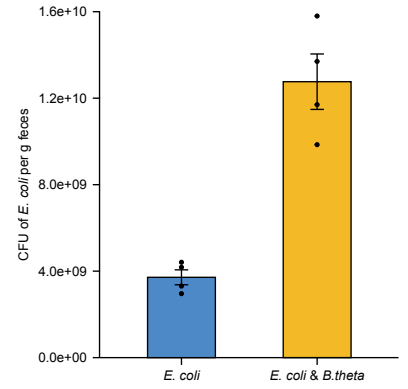**D**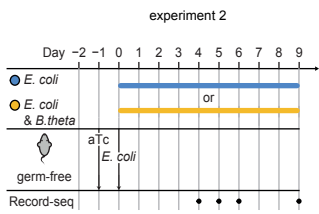**E**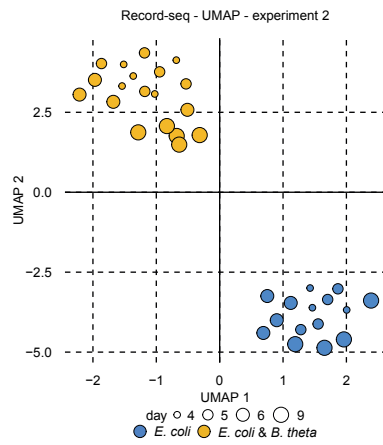**F**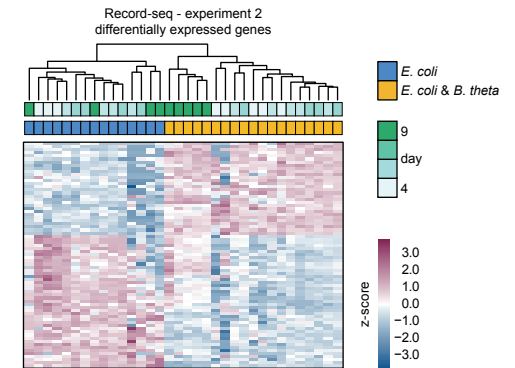**G**

*B. theta* co-colonization differentially expressed genes (DEG) overlap

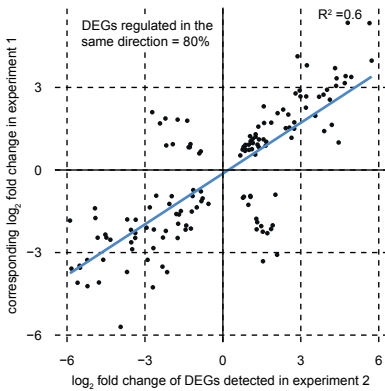

**Fig. S7. Record-seq illuminates both host-microbe and microbe-microbe interactions.**

(A and B) STRING analysis of genes significantly (A) upregulated or (B) downregulated in *E. coli* in the presence of *B. theta* compared to *E. coli* in monocolonized mice. Node size indicates  $\log_2FC$  (panel A: 0.2-5.7, panel B: 0.2-6.4). (C) Bar plot showing *E. coli* colony forming unit (CFU) counts per g of feces on day 7, shown is mean  $\pm$  s.e.m.,  $P=0.02857$  (Wilcoxon rank sum test). (D) Timeline of longitudinal in vivo recording experiment for illuminating the interaction of *E. coli* with *B. theta* in the mouse gut. Germ-free mice were supplied with aTc in the drinking water and orally gavaged with *E. coli* sentinel cells alone or together with *B. theta*. Fecal Record-seq sampling is indicated. (E) UMAP embedding of Record-seq data from *E. coli* in the presence (yellow) or absence (blue) of *B. theta* on days 4 to 9. Dot sizes denote successive time points. (F) Heatmap showing hierarchical clustering of Record-seq data from *E. coli* in the presence (yellow) or absence (blue) of *B. theta* on indicated days using the identified differentially expressed genes (DEGs). Z-score standardized gene-aligning spacer counts are shown. (G) Scatter plot showing the correlation in  $\log_2FC$  of DEGs and percentage of these genes regulated in the same direction for the two experiments outlined in **Fig. 5A** and **fig. S7D**. Genes detected as differentially expressed for Record-seq from *E. coli* in the presence (yellow) or absence (blue) of *B. theta* in the experiment outlined in **Fig. 5A** were used to perform this analysis. Panels A to C correspond to the experiment outlined in **Fig. 5A** with n=4 independent biological replicates. Panels E and F correspond to the experiment outlined in **Fig. S7D** with n=4-5 independent biological replicates. Count threshold was  $5 \cdot 10^3$ . Outliers were excluded based on modified Z-score and relative deviation from the mean (see **Methods**).

**A**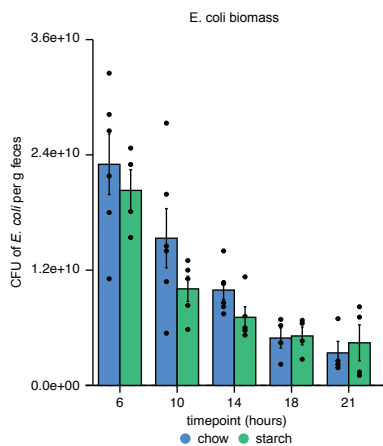**B**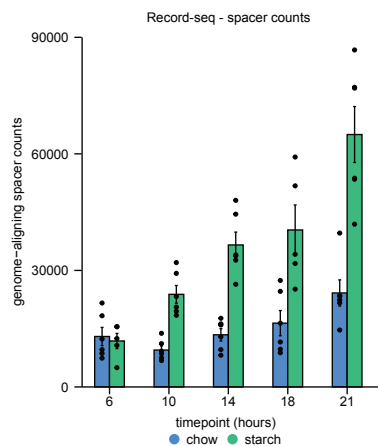**C**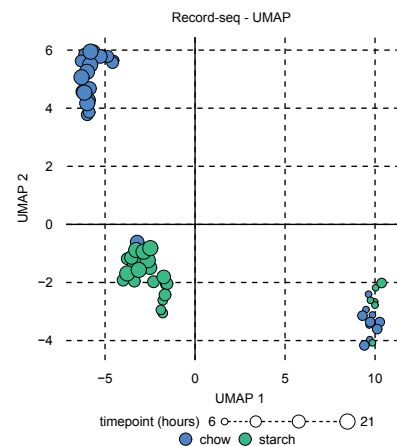**D**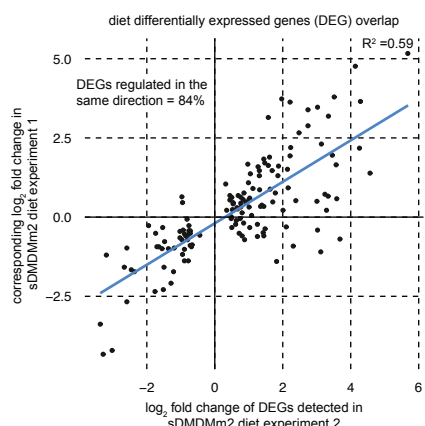**E**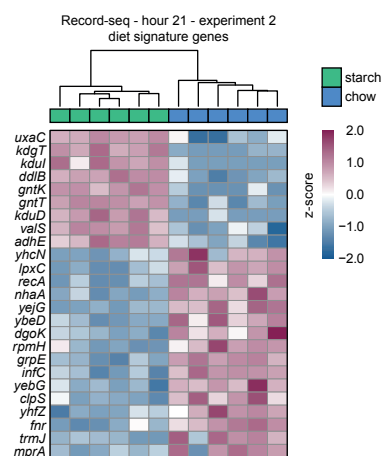**F**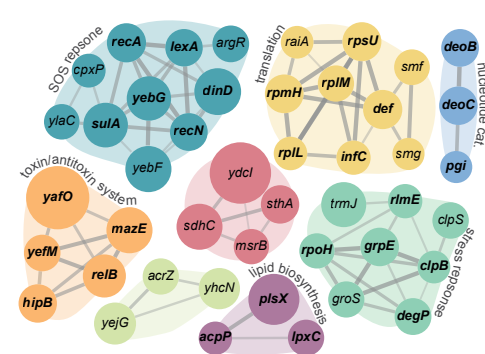**G**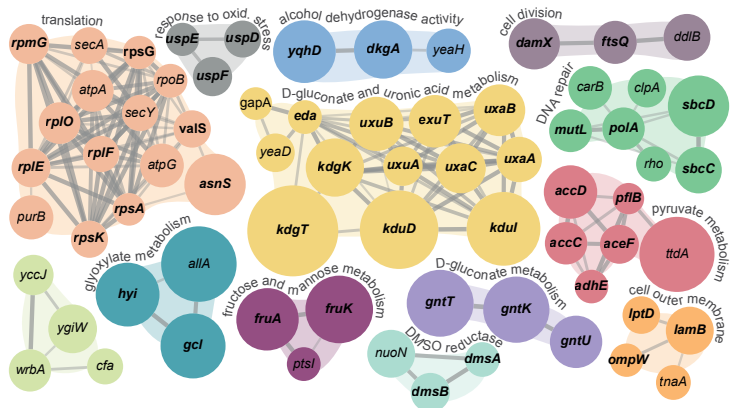



**Fig. S8. Sentinel cells are deployable within a complex microbiota.**

(A) Bar plot showing *E. coli* colony forming unit (CFU) counts per g of feces at the indicated timepoints. (B) Bar plot showing the number of *E. coli* genome-aligning spacers obtained per Record-seq sample from the feces of sDMDMm2 mice at the indicated timepoints after gavage of  $7 \cdot 10^{10}$  *E. coli* sentinel cells corresponding to **Fig. 6A**. Shown is the mean  $\pm$  s.e.m. (C) UMAP embedding of Record-seq data from mice fed a chow (blue), or starch (green) diet at 6, 10, 14, 18, and 21 hours. Dot sizes denote successive points. (D) Scatter plot showing the correlation in  $\log_2FC$  of DEGs and percentage of these genes regulated in the same direction for the two experiments outlined in **Fig. 6A** and an independent replicate experiment using a gavage dose of  $6 \cdot 10^{10}$  *E. coli* sentinel cells. Genes detected as differentially expressed for Record-seq from *E. coli* in the in sDMDMm2 mice on the chow or starch diet in the experiment outlined in **Fig. 6A** were used to perform this analysis. (E) Heatmap showing hierarchical clustering of Record-seq data at 21 hours using identified differentially expressed genes (DEGs). Z-score standardized gene-aligning spacer counts are shown. (F and G) STRING analysis of genes significantly upregulated in *E. coli* under a (F) chow or (G) starch diet in sDMDMm2 mice. Node size indicates  $\log_2FC$  (F: 0.4-3.2, G: 0.3-5.7). Panels A to G correspond to the experiment outlined in **Fig. 6A**, n=6 independent biological replicates. Panel D additionally uses data from an independent experiment with n=5 biological replicates. Count threshold was  $5 \cdot 10^3$ . Outliers were excluded based on modified Z-score and relative deviation from the mean (see **Methods**).

**A**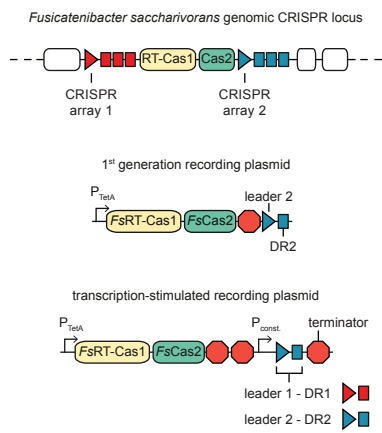**B**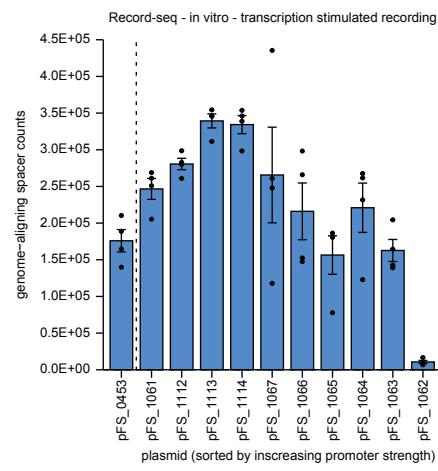**C**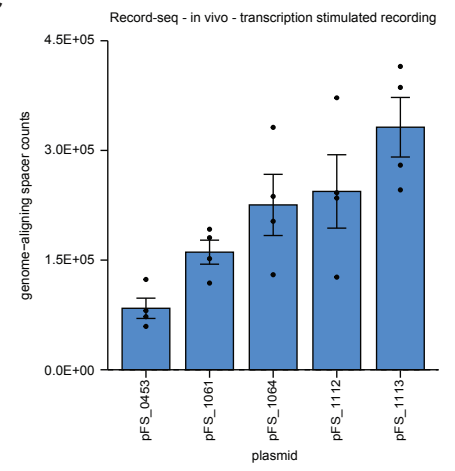

**Fig. S9. Active transcription of the CRISPR array improves spacer acquisition.**

(A) Schematic illustrating: (top) the genomic CRISPR locus of *Fusicatenibacter saccharivorans* (*Fs*), which encodes two CRISPR arrays (CRISPR array 1 and CRISPR array 2) with different leader and direct repeat (DR) sequences; (middle) the first generation recording plasmid encoding *FsRT-Cas1-Cas2* under transcriptional control of an anhydrotetracycline (aTc)-inducible promoter and a single terminator upstream of leader-DR2; and (bottom) the transcription-stimulated recording plasmid construct design. A double terminator downstream of *FsRT-Cas1-Cas2* minimizes transcriptional readthrough from the P<sub>TetA</sub> promoter whereas a constitutive promoter upstream of the leader-DR1 or leader-DR2 results in active transcription of the CRISPR array at a strength depending on the chosen promoter. (B) Bar plot showing the number of *E. coli* genome-aligning spacers obtained per Record-seq in vitro sample from *E. coli* cells transformed with the indicated transcriptional recording plasmids employing constitutive *E. coli* promoters from the Anderson promoter library upstream of the CRISPR array (**fig. S9A and Methods**) for DR1 and DR2. (C) Bar plot showing the number of *E. coli* genome-aligning spacers obtained per Record-seq in vivo sample from *E. coli* cells transformed with the indicated transcriptional recording plasmids. Panel B corresponds to an in vitro experiment with n=4 independent biological replicates. Panel C corresponds to an in vivo experiment with n=4 independent biological replicates.

**A**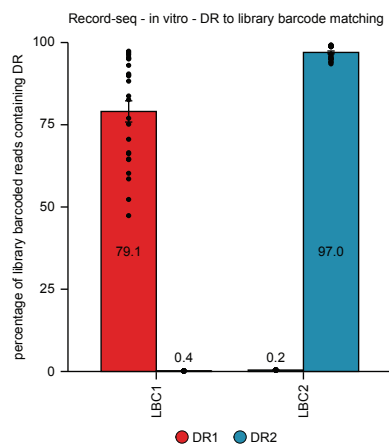**B**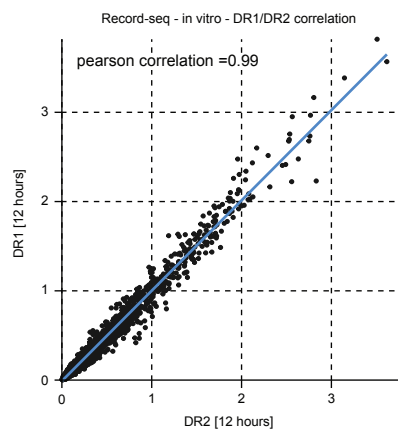**C**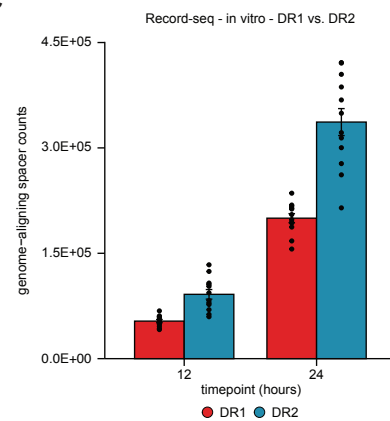**D**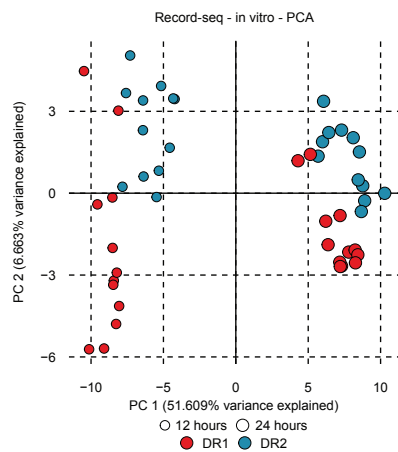

**Fig. S10. Barcoded CRISPR arrays enable multiplexed Record-seq in vitro.**

(A) Bar plot showing the number of reads correctly or erroneously assigned to the DR based on the library barcode (LBC) attached during the adapter ligation procedure in SENECA. Shown is the mean  $\pm$  s.e.m., n=12 independent biological replicates. (B) Scatter plot showing the correlation between mean normalized gene-aligning spacer-counts for Record-seq in vitro samples from *E. coli* cells transformed with transcriptional recording plasmid encoding *FsLeader1-DR1* (pFS\_1142) or *FsLeader2-DR2* (pFS\_1113) from hour 12. Shown is the mean of n=12 independent biological replicates. (C) Bar plot showing the number of *E. coli* genome-aligning spacers obtained per Record-seq in vitro sample from *E. coli* cells transformed with a transcriptional recording plasmid encoding *FsLeader1-DR1* (pFS\_1142) or *FsLeader2-DR2* (pFS\_1113). Shown is the mean  $\pm$  s.e.m. of 12 independent biological replicates. Samples from the 12 and 24-hour timepoints are matched (two timepoints obtained from the same culture). (D) PCA-projected Record-seq in vitro data from *E. coli* cells transformed with a transcriptional recording plasmid encoding *FsLeader1-DR1* (pFS\_1142) or *FsLeader2-DR2* (pFS\_1113) from hour 12 and 24. Dot sizes denote successive time points. Panels A to D correspond to an in vitro experiment with n=12 independent biological replicates. Count threshold was  $3 \cdot 10^4$ . Outliers were excluded based on modified Z-score and relative deviation from the mean (see **Methods**).

**A**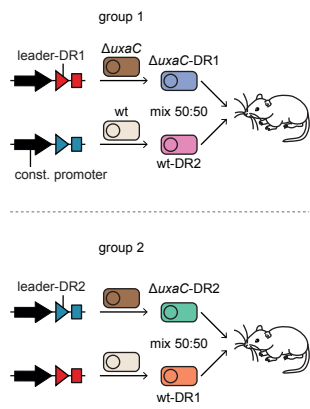**B**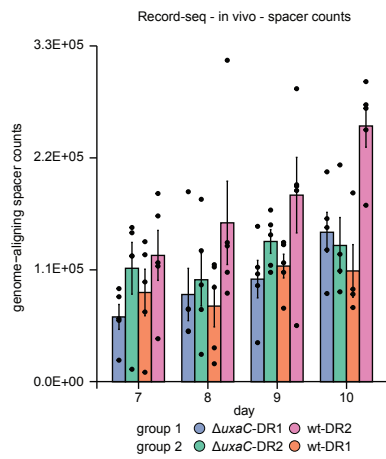

**Fig. S11. Barcoded CRISPR arrays enable multiplexed Record-seq in vivo.**

(A) Schematic illustrating full factorial design for multiplexed recording experiment with two experimental groups. Either wild-type (wt) *E. coli* transformed with leader-DR2 recording plasmid (blue) and  $\Delta$ *uxaC* *E. coli* transformed with leader-DR1 recording plasmid (pink) are mixed (group 1) or wt *E. coli* transformed with leader-DR1 recording plasmid (green) and  $\Delta$ *uxaC* *E. coli* transformed with leader-DR2 recording plasmid (green) are mixed and gavaged into germ-free mice. Since a stretch of sequence that is distinct between the DRs of these two CRISPR arrays is maintained throughout the library preparation procedure, this sequence could serve as a barcode and enable us to computationally discriminate spacers acquired into the two CRISPR arrays. We had previously demonstrated that both *Fs*CRISPR array-1 and array-2 were capable of spacer acquisition in an *E. coli* host (17). (B) Bar plot showing the number of *E. coli* genome-aligning spacers obtained per fecal Record-seq sample on the indicated days after gavage from experimental group 1 – gavaged with  $\Delta$ *uxaC* *E. coli* harboring DR1 recording plasmid (blue) and wt *E. coli* cells harboring DR2 recording plasmid (pink) in the same mouse, or experimental group 2 – gavaged  $\Delta$ *uxaC* *E. coli* harboring DR2 recording plasmid (green) and wt *E. coli* cells harboring DR1 recording plasmid (orange) in the same mouse. Panels A and B correspond to the experiment outlined in **Fig. 7A** with n=5 independent biological replicates.

**A**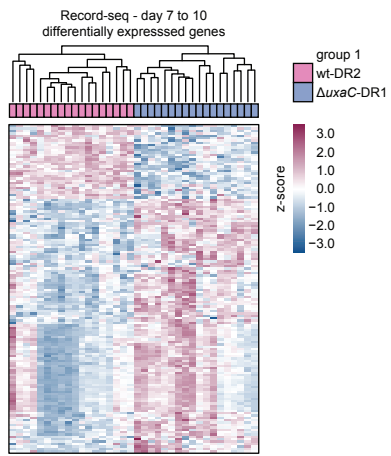**B**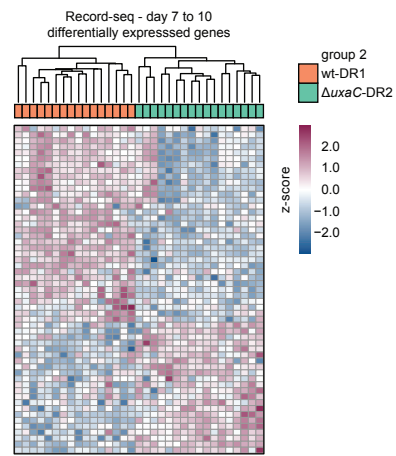**C**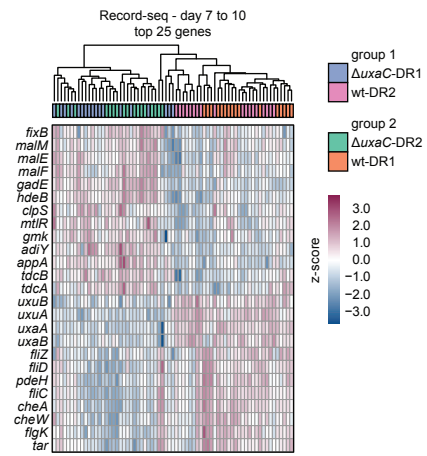



**Fig. S12. Record-seq enables multiplexed transcriptional profiling of isogenic bacterial strains cohabiting the mouse intestine.**

(A) Heatmap showing hierarchical clustering of Record-seq data from experimental group 1 consisting of  $\Delta$ *uxaC* *E. coli* harboring DR1 recording plasmid (blue) in the presence of wt *E. coli* harboring DR2 recording plasmid (pink) in the same mouse, using differentially expressed genes (DEGs) identified from days 7 to 10. Z-score standardized gene-aligning spacer counts are shown. (B) Heatmap showing hierarchical clustering of Record-seq data from experimental group 2 consisting of  $\Delta$ *uxaC* *E. coli* harboring DR2 recording plasmid (green) in the presence of wt *E. coli* harboring DR1 recording plasmid (orange) in the same mouse, using identified DEGs identified from days 7 to 10. Z-score standardized gene-aligning spacer counts are shown. (C) Heatmap showing hierarchical clustering of Record-seq data from experimental group 1 consisting of  $\Delta$ *uxaC* *E. coli* harboring DR1 recording plasmid (blue) in the presence of wt *E. coli* harboring DR2 recording plasmid (pink) in the same mouse and experimental group 2 consisting of  $\Delta$ *uxaC* *E. coli* harboring DR2 recording plasmid (green) in the presence of wt *E. coli* harboring DR1 recording plasmid (orange) in the same mouse. The top 25 DEGs are shown. Z-score standardized gene-aligning spacer counts are shown. Panels A to C correspond to the experiment outlined in **Fig. 7A** with n=5 independent biological replicates. Count threshold was  $10^4$ . Outliers were excluded based on modified Z-score and relative deviation from the mean (see **Methods**).

## Supplementary Tables

**Table S1.** Composition of the standard rodent chow diet, purified starch- and fat-based diets.

**Table S2.** Genes differentially expressed in *E. coli* as detected by Record-seq on day 7, pairwise comparison of monocolonized with *E. coli* MG1655 (wt) mice on chow, star or fat diets, experiment 1, corresponding to **Fig. 1D**.

**Table S3.** Genes differentially expressed in *E. coli* as detected by Record-seq on day 7, pairwise comparison of monocolonized with *E. coli* MG1655 (wt) mice on chow, starch or fat diets, experiment 2, corresponding to **fig. S3A**.

**Table S4.** Genes differentially expressed in *E. coli* MG1655 as detected by Record-seq or RNA-seq and ordered as displayed in the heatmaps of **Fig. 2A; Fig. 3B; Fig. 4C; Fig. 5C; Fig. 6C; Fig. 7B; fig. S2 D and E; fig. S3, G and H; fig. S5E; fig. S6H; fig. S7F and fig. S12, A to C**.

**Table S5.** Full output of EcoCyc pathway analysis based on Record-seq on day 7, pairwise comparison of *E. coli* in mice on different diets, experiment 1, corresponding to **Fig. 1D**.

**Table S6.** KEGG- and GO-based OA analysis based on Record-seq on day 7, pairwise comparison of *E. coli* in mice on different diets, experiment 1, corresponding to **Fig. 1D**.

**Table S7.** Genes differentially expressed in *E. coli* MG1655 as detected by Record-seq in the pairwise comparison of chow-fed mice to starch-fed mice along with corresponding ***log<sub>2</sub>FC*** values from RNA-seq of the feces, cecum, proximal colon and distal colon corresponding to **Fig. 3A**.

**Table S8.** Genes differentially expressed in *E. coli* MG1655 (wt) as detected by Record-seq, pairwise comparison of control mice to mice treated 2% (w/v) DSS in the drinking water, corresponding to **Fig. 4D**.

**Table S9.** Full output of EcoCyc pathway analysis based on Record-seq, pairwise comparison of *E. coli* in control mice to mice treated with 2% DSS in the drinking water, corresponding to **Fig. 4D**.

**Table S10.** KEGG- and GO-based OA pathway analysis based on Record-seq, pairwise comparison of *E. coli* in control mice to mice treated with 2% DSS in the drinking water, corresponding to **Fig. 4D**.

**Table S11.** Genes differentially expressed in *E. coli* as detected by Record-seq, pairwise comparison of *E. coli* in the presence or absence of *B. theta* in the same mouse, experiment 1, corresponding to **Fig. 5A**.

**Table S12.** Genes differentially expressed in *E. coli* as detected by Record-seq, pairwise comparison of *E. coli* in the presence or absence of *B. theta* in the same mouse, experiment 2, corresponding to **fig. S7D**.

**Table S13.** Full output of EcoCyc pathway analysis based on Record-seq, pairwise comparison of *E. coli* in the presence or absence of *B. theta*, corresponding to **Fig. 5A**.

**Table S14.** KEGG- and GO-based OA pathway analysis based on Record-seq, pairwise comparison of *E. coli* in the presence or absence of *B. theta*, corresponding to **Fig. 5A**.

**Table S15.** Genes differentially expressed in *E. coli* as detected by Record-seq at the 21-hour timepoint, pairwise comparison of sDMDMm2 mice on chow diet and starch-based diet, corresponding to **Fig. 6A**.

**Table S16.** Genes differentially expressed in *E. coli* as detected by Record-seq at the 21-hour timepoint, pairwise comparison of sDMDMm2 mice on chow diet and starch-based diet, corresponding to **fig. S8D** and an independent experimental replicate.

**Table S17.** Full output of EcoCyc pathway analysis based on Record-seq, pairwise comparison of sDMDMm2 mice on chow diet and starch-based diet, corresponding to **Fig. 6A**.

**Table S18.** KEGG- and GO-based OA analysis based on Record-seq, pairwise comparison of sDMDMm2 mice on chow diet and starch-based diet, corresponding to **Fig. 6A**.

**Table S19.** Genes differentially expressed in wt *E. coli* and  $\Delta$ *uxaC* *E. coli* as detected by Record-seq from aggregate counts, pairwise comparison on the starch-based diet, corresponding to **fig. S11A**.

**Table S20.** Full output of EcoCyc pathway analysis based on Record-seq, pairwise comparison on the starch-based diet, corresponding to **fig. S11A**.

**Table S21.** KEGG- and GO-based OA analysis based on Record-seq, pairwise comparison on the starch-based diet, corresponding to **fig. S11A**.

Tables S1 to S21 are supplied as excel sheets due to size constrains.

| <i>E. coli</i> strain                                   | supplier             | order # | genotype                                                                                                                                                                        |
|---------------------------------------------------------|----------------------|---------|---------------------------------------------------------------------------------------------------------------------------------------------------------------------------------|
| BL21-Gold(DE3)                                          | Agilent Technologies | 230132  | <i>E. coli</i> B F <sup>-</sup> <i>ompT hsdS</i> (r <sub>B</sub> <sup>-</sup> m <sub>B</sub> <sup>-</sup> ) <i>dcm</i> <sup>+</sup> Tet <sup>R</sup> gal λ(DE3) <i>endA</i> Hte |
| MG1655 (Bern)                                           | Andrew Macpherson    | NA      | F <sup>-</sup> lambda <sup>-</sup> rph-1                                                                                                                                        |
| MG1655 Str <sup>R</sup> Δ <i>gntK</i> /Δ <i>idnK</i>    | Tyrrell Conway       | NA      | F <sup>-</sup> lambda <sup>-</sup> rph-1 Δ <i>gntK</i> Δ <i>idnK</i> Str <sup>R</sup>                                                                                           |
| MG1655 Str <sup>R</sup> Δ <i>uxaC</i>                   | Tyrrell Conway       | NA      | F <sup>-</sup> lambda <sup>-</sup> rph-1 Δ <i>uxaC</i> Str <sup>R</sup> Kan <sup>R</sup>                                                                                        |
| MG1655 Str <sup>R</sup> Δ <i>uxaC</i> ΔKan <sup>R</sup> | Tyrrell Conway       | NA      | F <sup>-</sup> lambda <sup>-</sup> rph-1 Δ <i>uxaC</i> Str <sup>R</sup>                                                                                                         |
| MG1655 Str <sup>R</sup>                                 | Tyrrell Conway       | NA      | F <sup>-</sup> lambda <sup>-</sup> rph-1 Str <sup>R</sup>                                                                                                                       |
| MG1655 Str <sup>R</sup> NaI <sup>R</sup>                | Tyrrell Conway       | NA      | F <sup>-</sup> , lambda <sup>-</sup> rph-1 Str <sup>R</sup> NaI <sup>R</sup>                                                                                                    |

**Table S22. *E. coli* strains used in this study.**

| Bacterial species                                             | DSMZ      |
|---------------------------------------------------------------|-----------|
| <i>Lachnospirillum</i> sp. YL32                               | DSM 26114 |
| <i>Ruminiclostridium</i> sp. KB18                             | DSM 26090 |
| <i>Bacteroides</i> sp. I48                                    | DSM 26085 |
| <i>Parabacteroides</i> sp. YL27                               | DSM 28989 |
| <i>Burkholderiales</i> bacterium YL45                         | DSM 26109 |
| <i>Erysipelotrichaceae</i> bacterium I46                      | DSM 26113 |
| <i>Blautia</i> sp. YL58                                       | DSM 26115 |
| <i>Flavonifractor plautii</i> YL31                            | DSM 26117 |
| <i>Bifidobacterium animalis</i> subsp. <i>animalis</i><br>YL2 | DSM 26074 |
| <i>Lactobacillus reuteri</i> I49                              | DSM 32035 |
| <i>Akkermansia muciniphila</i> YL44                           | DSM 26127 |
| <i>Enterococcus faecalis</i> KB1                              | DSM 32036 |

**Table S23. Taxa of the stable defined moderately diverse mouse microbiota 2 (sDMDMm2).**

| Primer  | Sequence (5' → 3')                   |
|---------|--------------------------------------|
| FS_2814 | GTACTGGCGTATGAATCACG                 |
| FS_2815 | CGAATCAGGATAATACCCGG                 |
| FS_2816 | HEX-AGCGATCTGAAGAACCAGGAAT-<br>BHQ-1 |

**Table S24. ddPCR primers and probe.**

| Primer  | Sequence (5' → 3')                                                                                                                                                                                                                                                                                                                                                                                                                                                                                                                                                                                                                                                                                                                                                                                                              |
|---------|---------------------------------------------------------------------------------------------------------------------------------------------------------------------------------------------------------------------------------------------------------------------------------------------------------------------------------------------------------------------------------------------------------------------------------------------------------------------------------------------------------------------------------------------------------------------------------------------------------------------------------------------------------------------------------------------------------------------------------------------------------------------------------------------------------------------------------|
| FS_0963 | GTGACTGGAGTTCAGACGTGTGCTCTTCCGATC                                                                                                                                                                                                                                                                                                                                                                                                                                                                                                                                                                                                                                                                                                                                                                                               |
| FS_0964 | AAAGGATCGGAAGAGCACACGTCTGAACTCCAGTCAC                                                                                                                                                                                                                                                                                                                                                                                                                                                                                                                                                                                                                                                                                                                                                                                           |
| FS_2759 | AAAGATTTGTACCAAGGTTCTAGNNNNNNNNNGATCGGAAGAGCACACGTCT<br>GAACTCCAGTCAC                                                                                                                                                                                                                                                                                                                                                                                                                                                                                                                                                                                                                                                                                                                                                           |
| FS_2769 | CTAGGAACCTTGGTACAAAT                                                                                                                                                                                                                                                                                                                                                                                                                                                                                                                                                                                                                                                                                                                                                                                                            |
| FS_3046 | GAGTTGATAGACAATGTAACCCACTCGTGCACCTCGAGCAACTGATCTTATAGA<br>TACAGCATCTTTTACTTTTCTCGAGTAGCCTAGCATAACCCCGCGGGGCTCTT<br>CGGGGTCTCGCGGGGTTTTTTGCTATAAAACGAAAGGCTCAGTCGAAAGACTG<br>GGCCTTTCGTTTTATCTGCTAACAAAGCCCGAAAGGAAGCTGAGTTGGCTGCTG<br>CCACCGCTGAGCAATAACTAGCATAACCCCTTGGGGCCTCTAAACGGGTCTTGA<br>GGGGTTTTTTGCTGAAAGGAGGAACTATATCCGGATGTCTTCATGGTAGTACCA<br>AGATACGAAGACATAGTGGCGGGGAAGCTTATGTTCCATAGCAAAAAGTCGGTC<br>AGTCTCGTGGCTGAAATCATGAGTTCACAAAATGGCTGAAATTCAAGGAAAAT<br>CAGGAATCTCAGAAAACGATCGACCGACTTTTTTCGATAAAAATGGTTGCAAAA<br>TGAGAAAATCTGATTTAATAGAATCTGAAAACAGCGGAAATGCTGTTGTCGTA<br>CTTTACCTAAAAGGAATTGAAACGTCCCCGCCAGGTTGAATCCGATATTTGGAG<br>GTACGATGGAACAGTCTGGGTGGGATTGAGAAGAGAAAAGAAAACCGCCGATCC<br>TGTCCACCGCATTACTGCAAGGTAGTGGACAAGACCGGCGGTCTTAAGTTTTTT<br>GGCTGAAGCGGCCGCCTCATGGTTATGGCAGCACTGCATAATTTTCTTA |
| FS_3047 | CCGGAACCTTGACAATTAATCATCCGGCTCGTATAATGTGTGGAGG                                                                                                                                                                                                                                                                                                                                                                                                                                                                                                                                                                                                                                                                                                                                                                                  |
| FS_3048 | CACTCCTCCACACATTATACGAGCCGGATGATTAATTGTCAAGTT                                                                                                                                                                                                                                                                                                                                                                                                                                                                                                                                                                                                                                                                                                                                                                                   |
| FS_3049 | CCGGATTGACGGCTAGCTCAGTCCTAGGTACAGTGCTAGCTCTAGT                                                                                                                                                                                                                                                                                                                                                                                                                                                                                                                                                                                                                                                                                                                                                                                  |
| FS_3050 | CACTACTAGAGCTAGCACTGTACCTAGGACTGAGCTAGCCGTCAAT                                                                                                                                                                                                                                                                                                                                                                                                                                                                                                                                                                                                                                                                                                                                                                                  |
| FS_3051 | CCGGATTTACGGCTAGCTCAGTCCTAGGTATAGTGCTAGCTCTAGT                                                                                                                                                                                                                                                                                                                                                                                                                                                                                                                                                                                                                                                                                                                                                                                  |
| FS_3052 | CACTACTAGAGCTAGCACTATAACCTAGGACTGAGCTAGCCGTAAAT                                                                                                                                                                                                                                                                                                                                                                                                                                                                                                                                                                                                                                                                                                                                                                                 |
| FS_3053 | CCGGATTTACGGCTAGCTCAGTCCTAGGTACAATGCTAGCTCTAGT                                                                                                                                                                                                                                                                                                                                                                                                                                                                                                                                                                                                                                                                                                                                                                                  |
| FS_3054 | CACTACTAGAGCTAGCATTGTACCTAGGACTGAGCTAGCCGTAAAT                                                                                                                                                                                                                                                                                                                                                                                                                                                                                                                                                                                                                                                                                                                                                                                  |
| FS_3055 | CCGGATTTATAGCTAGCTCAGCCCTTGGTACAATGCTAGCTCTAGT                                                                                                                                                                                                                                                                                                                                                                                                                                                                                                                                                                                                                                                                                                                                                                                  |
| FS_3056 | CACTACTAGAGCTAGCATTGTACCAAGGGCTGAGCTAGCTATAAAT                                                                                                                                                                                                                                                                                                                                                                                                                                                                                                                                                                                                                                                                                                                                                                                  |
| FS_3057 | CCGGATTGACAGCTAGCTCAGTCCTAGGGATTGTGCTAGCTCTAGT                                                                                                                                                                                                                                                                                                                                                                                                                                                                                                                                                                                                                                                                                                                                                                                  |



FS\_3058 CACTACTAGAGCTAGCACAAATCCCTAGGACTGAGCTAGCTGTCAAT  
 FS\_3210 CCGGATTTACAGCTAGCTCAGTCCTAGGGACTGTGCTAGCTCTAGT  
 FS\_3211 CACTACTAGAGCTAGCACAGTCCCTAGGACTGAGCTAGCTGTAAAT  
 FS\_3212 CCGGACTGATAGCTAGCTCAGTCCTAGGGATTATGCTAGCTCTAGT  
 FS\_3213 CACTACTAGAGCTAGCATAATCCCTAGGACTGAGCTAGCTATCAGT  
 FS\_3214 CCGGACTGATAGCTAGCTCAGTCCTAGGGATTATGCTAGCTCTAGT  
 FS\_3215 CACTACTAGAGCTAGCATAATCCCTAGGACTGAGCTAGCTATCAGT  
 FS\_3344 GTGATCTAACTCGAGTAGCCTAGCATAACCCCGCGGGGCTCTTCGGGGGTCTC  
 GCGGGGTTTTTTGCTATAAAACGAAAGGCTCAGTCGAAAGACTGGGCCTTTCGT  
 TTTATCTGCTAACAAAGCCCGAAAGGAAGCTGAGTTGGCTGCTGCCACCGCTGA  
 GCAATAACTAGCATAACCCCTTGGGGCCTCTAAACGGGTCTTGAGGGGTTTTTT  
 GCTGAAAGGAGGAACTATATCCGGACTGATAGCTAGCTCAGTCCTAGGGATTAT  
 GCTAGCTCTAGTAGTGGAGAATTAATTTGGAAAAAGTCGGTCGATCTCATGCCT  
 GAAATCATGAATTCGCAAAATGGCGGAAATTTAAGGAAAATCAGGAATCTCAG  
 AAAAACGATCGACCGACTTTTGTGATAAAAATGGTTGCAAAAAGAGAAAAATTT  
 GATTTAATAGAATGTGAAAATAGCGGAAATGCTGATGTTGTACCTTACCTATGA  
 GGAATTGAAACGTCCCCGCCAGGTTGAATCCGATATTTGGAGGTACGATGGAAC  
 AGTCTGGGTGGGATTGAGAAGAGAAAAGAAAACCGCCGATCCTGTCCACCGCAT  
 TACTGCAAGGTAGTGGACAAGACCGGCGGTCTTAAGTTTTTTGGCTGAAGCGGC  
 CGCTATTCT  
 FS\_3194 AAAGCTAATATACCACCAGCAGTANNNNNNNNNNGATCGGAAGAGCACACGTCT  
 GAACTCCAGTCAC  
 FS\_3204 TACTGCTGGTGGTATATTAG  
 FS\_3316 TGAGATTACGATCGCCAGGTCATGNNNNNNNNNNGATCGGAAGAGCACACGTCT  
 GAACTCCAGTCAC  
 FS\_3321 CATGACCTGGCGATCGTAAT  
 FS\_0968 ACACTCTTTCCCTACACGACGCTCTTCCGATCTNNCCTAAAAGGAATTGAAAC  
 FS\_0969 ACACTCTTTCCCTACACGACGCTCTTCCGATCTNNCCTAAAAGGAATTGAAAC  
 FS\_0970 ACACTCTTTCCCTACACGACGCTCTTCCGATCTNNCCTAAAAGGAATTGAAA  
 C

FS\_0971 ACACTCTTTCCCTACACGACGCTCTTCCGATCTNNNNNCCTAAAAGGAATTGAA  
AC

FS\_0972 ACACTCTTTCCCTACACGACGCTCTTCCGATCTNNNNNCCTAAAAGGAATTGA  
AAC

FS\_0973 ACACTCTTTCCCTACACGACGCTCTTCCGATCTNNNNNNNCCTAAAAGGAATTG  
AAAC

FS\_0974 ACACTCTTTCCCTACACGACGCTCTTCCGATCTNNNNNNNCCTAAAAGGAATT  
GAAAC

FS\_3325 ACACTCTTTCCCTACACGACGCTCTTCCGATCTNNACCTATGAGGAATTGAAAC

FS\_3326 ACACTCTTTCCCTACACGACGCTCTTCCGATCTNNNACCTATGAGGAATTGAAA  
C

FS\_3327 ACACTCTTTCCCTACACGACGCTCTTCCGATCTNNNNACCTATGAGGAATTGAA  
AC

FS\_3328 ACACTCTTTCCCTACACGACGCTCTTCCGATCTNNNNNACCTATGAGGAATTGA  
AAC

FS\_3329 ACACTCTTTCCCTACACGACGCTCTTCCGATCTNNNNNACCTATGAGGAATTG  
AAAC

FS\_3330 ACACTCTTTCCCTACACGACGCTCTTCCGATCTNNNNNNNACCTATGAGGAATT  
GAAAC

FS\_3331 ACACTCTTTCCCTACACGACGCTCTTCCGATCTNNNNNNNACCTATGAGGAAT  
TGAAAC

FS\_2238 AAAGCACTTTGGTTATAGAAGAGGGATCGGAAGA  
GCACACGTCTGAACTCCAGTCAC

FS\_2240 AAAGTCCCATGAATGTTCCACATGATCGGAAGAG  
CACACGTCTGAACTCCAGTCAC

FS\_2246 GTGACTGGAGTTCAGACGTGTGCTCTTCCGATCC  
CTCTTCTATAACCAAAGTG

FS\_2248 GTGACTGGAGTTCAGACGTGTGCTCTTCCGATCA  
TGTGGAACATTCATGGGA

FS\_2758 AAAGACTTTCCGCACAAACCGTGANNNNNNNNNN  
GATCGGAAGAGCACACGTCTGAACTCCAGTCAC

|         |                                                                         |
|---------|-------------------------------------------------------------------------|
| FS_2762 | AAAGACAATCCGTCAAGTCACTAGNNNNNNNNNN<br>GATCGGAAGAGCACACGTCTGAACTCCAGTCAC |
| FS_2760 | AAAGTAAACGACTACACCCGCTCGNNNNNNNNNN<br>GATCGGAAGAGCACACGTCTGAACTCCAGTCAC |
| FS_2761 | AAAGCGATATCATCGTCCCTTTGTNNNNNNNNNN<br>GATCGGAAGAGCACACGTCTGAACTCCAGTCAC |
| FS_2768 | TCACGGTTTGTGCGGAAAGT                                                    |
| FS_2770 | CGAGCGGGTGTAGTCGTTTA                                                    |
| FS_2771 | ACAAAGGGACGATGATATCG                                                    |
| FS_2772 | CTAGTGACTIONGACGGATTGT                                                  |
| FS_2806 | AAAGACGCAGGAAACAGGCTTGAT                                                |
| FS_2807 | ATCAAGCCTGTTTCCTGCGT                                                    |

---

**Table S25. Oligonucleotides for cloning and SENECA adapter ligation oligonucleotides.**
